# Supplementary material for: Continuous Requirement for the Clr4 Complex But Not RNAi for Centromeric Heterochromatin Assembly in Fission Yeast Harboring a Disrupted RITS Complex
Source: PLOS journal article supplement (doi:10.1371/journal.pgen.1001174), 2010-10-28

**Figure S1**

**A**

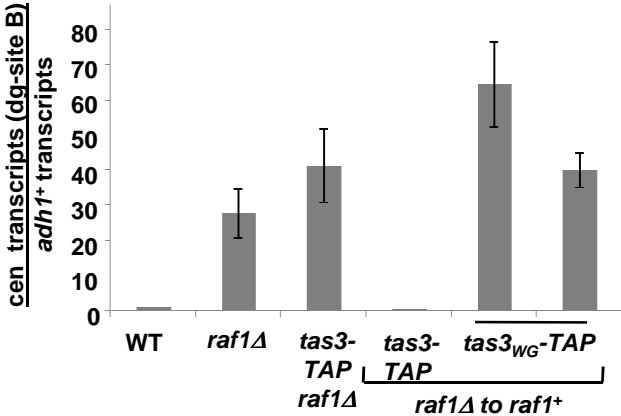

**B**

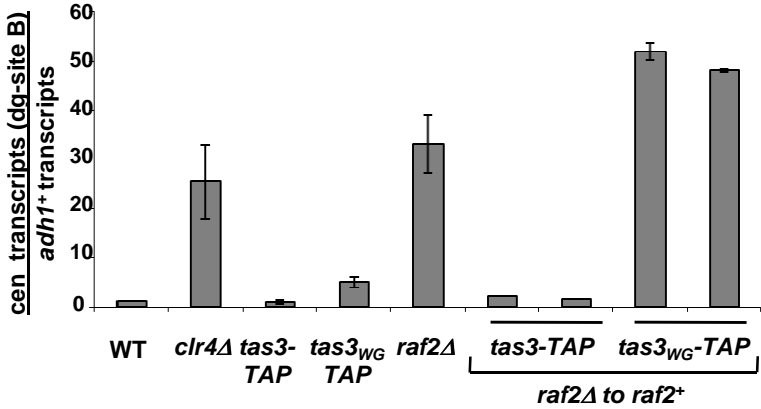

Supplement: S1 (10.1371/journal.pgen.1001174.s001) [file journal.pgen.1001174.s001]
